# Supplementary material for: Impaired reward-related learning signals in remitted unmedicated patients with recurrent depression
Source: PubMed Central journal article supplement — Brain. 2019 Jul 5;142(8):2510–22. doi: 10.1093/brain/awz167 (PMC6734943; doi:10.1093/brain/awz167), 2019-07-05
Supplement: awz167_supplementary_material.pdf [file awz167_supplementary_material.pdf]

**Supplementary material for ‘Impaired reward-related learning signals in remitted unmedicated patients with recurrent depression’**

**Table of Contents**

Learning rate selection procedure..... 2

Results learning rate selection procedure..... 3

Results main effects ..... 5

TD-error results after HDRS correction..... 6

Results between group activation with SPSS test statistics..... 7

Results analysis 6mm smoothing kernel ..... 8

Results analysis without noise correction ..... 11

References ..... 14

## Learning rate selection procedure

As recommended for model-based fMRI analysis (Wilson and Niv, 2015) we selected multiple plausible learning rates from literature (0.1 and 0.4 from Kumar *et al.* (2008) and O’Doherty *et al.* (2006); 0.2 from O’Doherty *et al.* (2003; 2004); 0.45 from Gradin *et al.* (2011); 0.5 from Lawson *et al.* (2017) ) and explored which learning rate fitted our data best. For all learning rates we calculated signal-to-noise (SNR) values within our a priori VTA ROI, by dividing the contrast map from the CS\*TD+US\*TD contrast by the residual variance estimate map. For a complete overview, we calculated SNR values based on a one-group t-test contrast map across all subjects (Supplementary Fig. 1A), as well as on the two-group t-test contrast map (Supplementary Fig. 1B). Second, we also determined estimation efficiency values of SPM designs (Liu *et al.* (2001)) across all subjects (Supplementary Fig. 1C). Third, we compared TD-related VTA activation across the range of learning rates to ensure our results were robust.

## Results learning rate selection procedure

When comparing the TD-related activation of alternative plausible learning rates, there was a significant difference between SNR for different learning rates, both when calculations were based on the one-group contrast map ( $F_{4,135} = 7.30, P = 0.000$ ) as well as the two-group (group difference) contrast map ( $F_{4,135} = 57.49, P = 0.000$ ). Both SNR analyses revealed the highest SNR when using  $\alpha = 0.45$  (Supplementary Table 1, Supplementary Fig. 1A and 1B). In both SNR-analyses, Tukey HSD post-hoc tests confirmed a significant difference between  $\alpha = 0.1$  and the other learning rates. The SNR-analysis based on the group difference contrast map furthermore revealed a significant difference between  $\alpha = 0.2$  and the other learning rates. For the estimation efficiency calculations, there was a significant difference between all different learning rates ( $F_{4,310} = 6787.49, P = 0.000$ ). Tukey HSD post-hoc tests confirmed significant differences between all learning rates, where the model with  $\alpha = 0.5$  revealed the highest estimation efficiency (Supplementary Table 1, Supplementary Fig. 1C). When exploring TD-related VTA activation for all learning rates we found comparable results, with maximal responses for  $\alpha = 0.4, 0.45$  and  $0.5$  (Supplementary Table 2). Wilson and Niv (2015) report that different learning rates have relatively little effect on neural results, however, sensitivity of the model-based analysis to learning rate can increase when the contrast-to-noise ratio is high. In line with this observation, we therefore chose to report results for the learning rate with the highest SNR ( $\alpha = 0.45$ ).

**Supplementary Table 1. Descriptives for different learning rates**

|                                               | $\alpha = 0.1$ |       | $\alpha = 0.2$ |       | $\alpha = 0.4$ |       | $\alpha = 0.45$ |       | $\alpha = 0.5$ |       |
|-----------------------------------------------|----------------|-------|----------------|-------|----------------|-------|-----------------|-------|----------------|-------|
|                                               | Mean           | SD    | Mean           | SD    | Mean           | SD    | Mean            | SD    | Mean           | SD    |
| SNR based on one group (all subjects) map     | 0.003          | 0.016 | 0.029          | 0.023 | 0.031          | 0.023 | 0.032           | 0.027 | 0.027          | 0.029 |
| SNR based on two-group (group difference) map | -0.049         | 0.050 | 0.052          | 0.038 | 0.111          | 0.055 | 0.121           | 0.053 | 0.118          | 0.057 |
| Estimation efficiency                         | 0.115          | 0.014 | 0.244          | 0.032 | 0.473          | 0.019 | 0.523           | 0.012 | 0.571          | 0.010 |

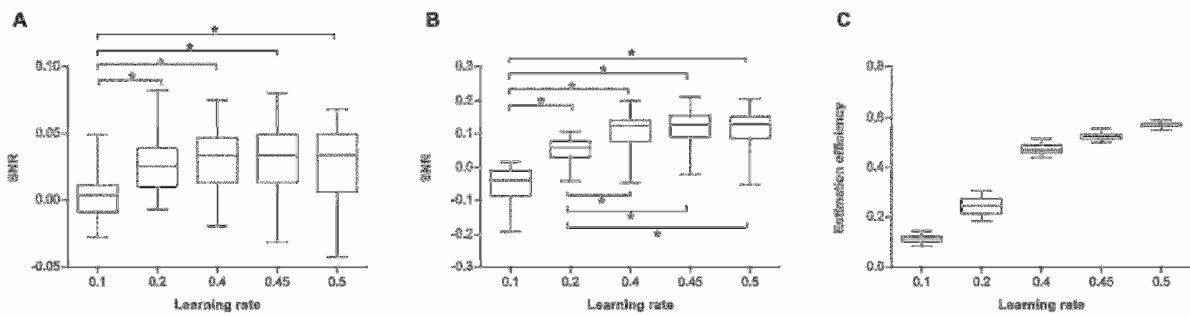

**Supplementary Figure 1. Model efficacy for different learning rates.** (A) SNR based on one-group (all subjects) contrast map (B) SNR based on two-group (group difference) contrast map (C) Estimation efficiency of SPM designs across all subjects.

**Supplementary Table 2. TD-related VTA activation for different learning rates**

| Learning rate   | Contrast                | Location | MNI coordinates | $z$  | Significance* |
|-----------------|-------------------------|----------|-----------------|------|---------------|
| $\alpha = 0.1$  | rrMDD>healthy controls  | VTA      | (0, -21, -3)    | -    | NS            |
| $\alpha = 0.2$  | rrMDD>healthy controls  | VTA      | (0, -21, -3)    | 2.17 | 0.110         |
| $\alpha = 0.4$  | rrMDD>healthy controls  | VTA      | (0, -21, -3)    | 2.84 | 0.024         |
| $\alpha = 0.45$ | rrMDD> healthy controls | VTA      | (0, -21, -3)    | 2.79 | 0.028         |
| $\alpha = 0.5$  | rrMDD> healthy controls | VTA      | (0, -21, -3)    | 2.60 | 0.045         |

CS=conditioned stimuli, US=unconditioned stimuli, TD=temporal difference signal, rrMDD=remitted recurrent major depressive disorder, VTA=Ventral Tegmental Area, \*FWE small volume corrected, NS = difference not significant after SVC

## Results main effects

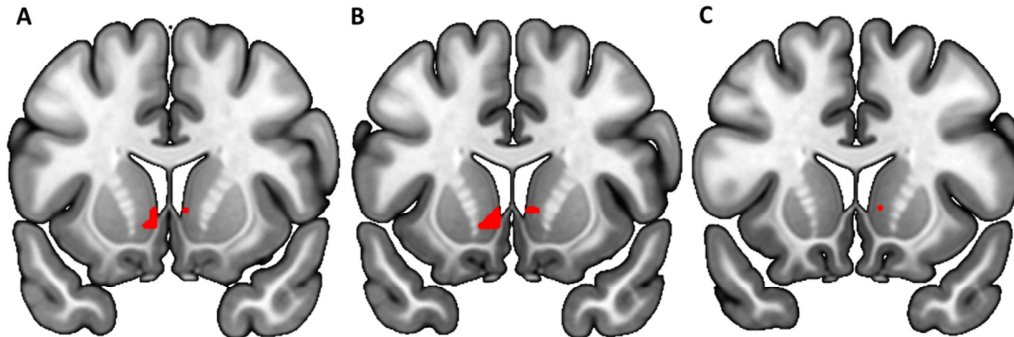

**Supplementary Figure 2. Main effect of cue and reward delivery.** (A) VS activation CSr+USr>Neutral contrast. (B) VS activation CSr>Neutral contrast. (C) VS activation USr>Neutral contrast.

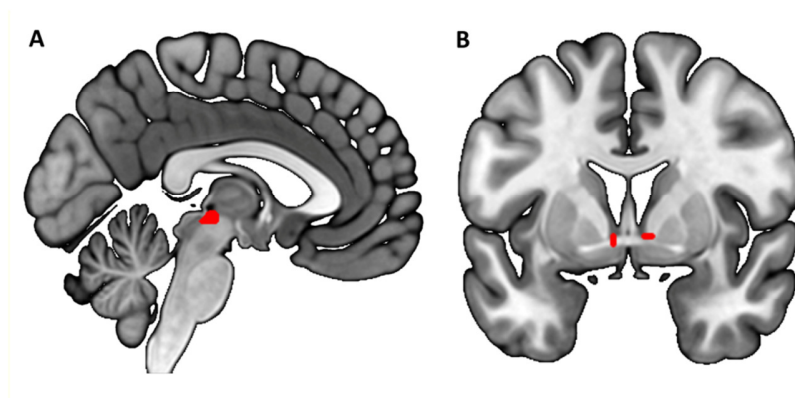

**Supplementary Figure 3. Main effect of PE.** (A) VTA activation CS\*TD+US\*TD contrast. (B) VS activation CS\*TD+US\*TD.

## TD-error results after HDRS correction

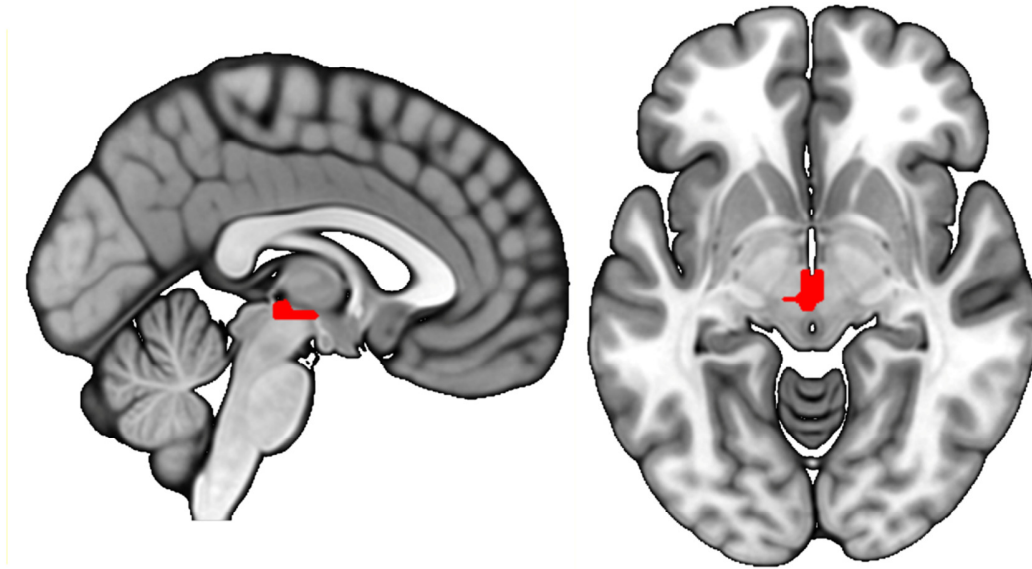

**Supplementary Figure 4. TD-error related activation comparing rrMDD vs. HC after HDRS correction.** MDD patients show more VTA activation compared to healthy controls ( $Z=2.57$ ,  $P=0.048$  FWE corrected on peak-level, SVC).

## Results between group activation with SPSS test statistics

Based on the suggestions of anonymous reviewers we performed a sensitivity analysis by extracting the beta-weights from the *a-priori* ROIs and perform statistical analyses in SPSS.

**Supplementary Table 3. Between group activation with SPSS test statistics**

|                   |                               | Contrast               | Location | MNI coordinates                | Test-statistic  | Significance <sup>a</sup> |
|-------------------|-------------------------------|------------------------|----------|--------------------------------|-----------------|---------------------------|
| Group differences | Total TD-signal (CS*TD+US*TD) | rrMDD>healthy controls | VTA      | (0, -21, -3)                   | $t(61) = -2.94$ | 0.005                     |
|                   |                               |                        | VS       | (9, 0, -3)<br>(-6, 3, -6)      | $t(61) = -3.12$ | 0.003                     |
|                   |                               | healthy controls>rrMDD |          | No clusters survived threshold |                 |                           |
|                   | CS*TD                         | rrMDD>healthy controls | VTA      | (0, -21, -3)                   | $t(61) = -2.26$ | 0.027                     |
|                   |                               | healthy controls>rrMDD |          | No clusters survived threshold |                 |                           |
|                   | US*TD                         | rrMDD>healthy controls | VTA      | (0, -18, -15)                  | $t(61) = -3.04$ | 0.003                     |
|                   |                               | healthy controls>rrMDD |          | No clusters survived threshold |                 |                           |

rrMDD=remitted recurrent major depressive disorder, HC=Healthy Controls, CS=conditioned stimuli, US=unconditioned stimuli, TD=temporal difference signal, VS=Ventral Striatum, VTA=Ventral Tegmental Area.

<sup>a</sup>two-sample t-test comparing beta weights from ROI voxels

## Results analysis 6mm smoothing kernel

Based on the suggestions of anonymous reviewers we performed a sensitivity analysis with the kernel used for smoothing at 6mm (as this has been suggested to be required at at least 2 times the voxel size). We however initially chose a smaller kernel based on the small size of the VTA, because when it comes to small brain areas, meaningful activations might be attenuated when the smoothing kernel is too large.

**Supplementary Table 4. Within group activation with alternative smoothing kernel of 6mm**

|                                        | Contrast               | Location | MNI coordinates | z    | Significance <sup>a</sup> |
|----------------------------------------|------------------------|----------|-----------------|------|---------------------------|
| Cue+reward delivery<br>(CS+US>Neutral) | rrMDD+healthy controls | VS       | (-6, 12, -6)    | 2.98 | 0.002                     |
|                                        |                        |          | (6, 12, 0)      | 2.93 | 0.002                     |
| Cue delivery alone<br>(CS>Neutral)     | rrMDD+healthy controls | VS       | (-9, 12, -6)    | 3.50 | 0.000                     |
|                                        |                        |          | (6, 9, 0)       | 3.36 | 0.000                     |
| Reward delivery alone<br>(US>Neutral)  | rrMDD+healthy controls | VS       | (-6, 18, -9)    | 2.61 | 0.004                     |
|                                        |                        |          | (6, 12, 0)      | 2.26 | 0.012                     |
| Total TD signal<br>(CS*TD+US*TD)       | rrMDD+healthy controls | VTA      | (0, -21, -3)    | 2.34 | 0.010                     |
|                                        |                        | VS       | (-9, -3, -3)    | 2.04 | 0.021                     |
|                                        |                        |          | (9, 0, -6)      | 1.87 | 0.031                     |

rrMDD=remitted recurrent major depressive disorder, HC=Healthy Controls, CS=conditioned stimuli, US=unconditioned stimuli, TD=temporal difference signal, VS=Ventral Striatum, VTA=Ventral Tegmental Area.

<sup>a</sup> $P_{\text{uncorrected}}$  to display extent of signal



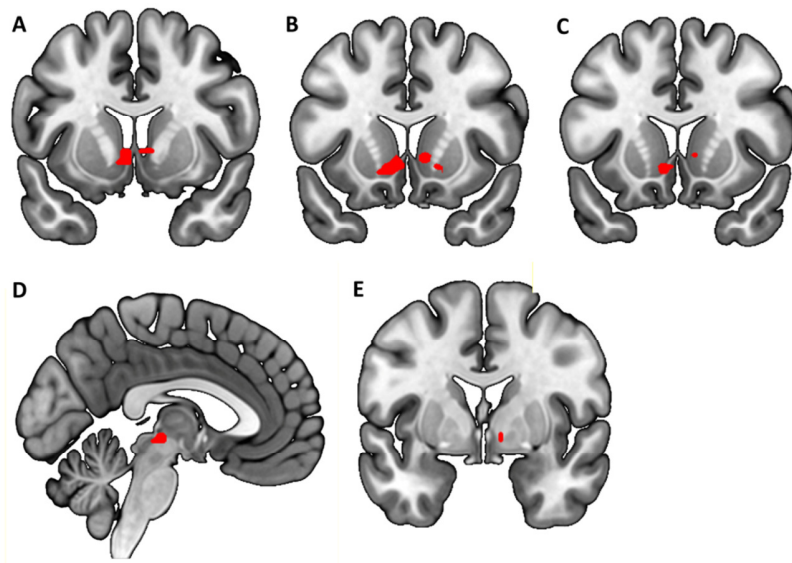

**Supplementary Figure 5. Main effects after 6mm smoothing. (A)** VS activation CSr+USr>Neutral. **(B)** VS activation CSr>Neutral. **(C)** VS activation USr>Neutral. **(D)** Main effect of PE in VTA (CS\*TD+US\*TD). **(E)** Main effect of PE in VS (CS\*TD+US\*TD).

**Supplementary Table 5. Between group activation for analysis with alternative smoothing kernel of 6mm and SPM test statistics**

|                                  | Contrast               | Location                       | MNI coordinates | <i>z</i> | Significance <sup>a</sup> |
|----------------------------------|------------------------|--------------------------------|-----------------|----------|---------------------------|
| Total TD-signal<br>(CS*TD+US*TD) | rrMDD>healthy controls | VTA                            | (0, -21, -6)    | 2.41     | 0.049                     |
|                                  |                        | VS                             | (-9, -3, -3)    | 2.77     | 0.195                     |
|                                  |                        |                                | (9, 0, -6)      | 2.59     | 0.279                     |
| CS*TD                            | rrMDD>healthy controls | VTA                            | (0, -21, -6)    | 1.93     | 0.124                     |
|                                  | healthy controls>rrMDD | No clusters survived threshold |                 |          |                           |
| US*TD                            | rrMDD>healthy controls | VTA                            | (3, -18, -6)    | 1.81     | 0.149                     |
|                                  | healthy controls>rrMDD | No clusters survived threshold |                 |          |                           |

rrMDD=remitted recurrent major depressive disorder, HC=Healthy Controls, CS=conditioned stimuli, US=unconditioned stimuli, TD=temporal difference signal, VS=Ventral Striatum, VTA=Ventral Tegmental Area.

<sup>a</sup>FWE peak level corrected + SVC

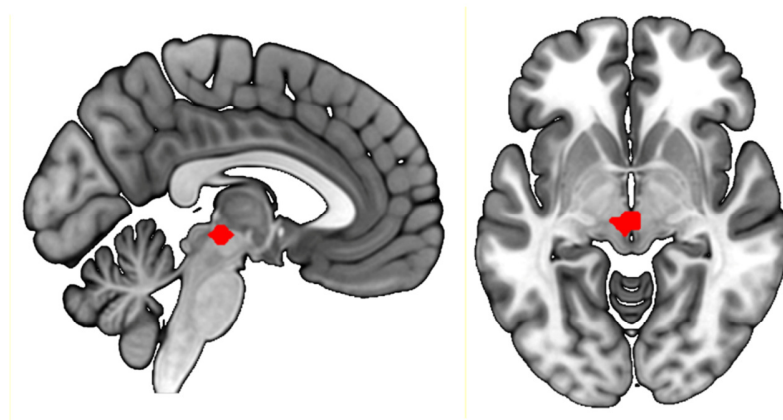

**Supplementary Figure 6. TD-error related activation comparing rrMDD vs. HC after 6mm smoothing.** MDD patients show more VTA activation compared to healthy controls ( $Z=2.41$ ,  $P=0.049$  FWE corrected on peak-level, SVC).

**Supplementary Table 6. Between group activation for analysis with alternative smoothing kernel of 6mm and SPSS test-statistics**

|                   |                               | Contrast               | Location                       | MNI coordinates            | Test-statistic  | Significance <sup>a</sup> |
|-------------------|-------------------------------|------------------------|--------------------------------|----------------------------|-----------------|---------------------------|
| Group differences | Total TD-signal (CS*TD+US*TD) | rrMDD>healthy controls | VTA                            | (0, -21, -6)               | $t(61) = -2.44$ | 0.018                     |
|                   |                               |                        | VS                             | (-9, -3, -3)<br>(9, 0, -6) | $t(61) = -2.55$ | 0.014                     |
|                   |                               | healthy controls>rrMDD | No clusters survived threshold |                            |                 |                           |
|                   | CS*TD                         | rrMDD>healthy controls | VTA                            | (0, -21, -6)               | $t(61) = -1.98$ | 0.052                     |
|                   |                               | healthy controls>rrMDD | No clusters survived threshold |                            |                 |                           |
|                   | US*TD                         | rrMDD>healthy controls | VTA                            | (3, -18, -6)               | $t(61) = -2.41$ | 0.019                     |
|                   |                               | healthy controls>rrMDD | No clusters survived threshold |                            |                 |                           |

rrMDD=remitted recurrent major depressive disorder, HC=Healthy Controls, CS=conditioned stimuli, US=unconditioned stimuli, TD=temporal difference signal, VS=Ventral Striatum, VTA=Ventral Tegmental Area.

<sup>a</sup>two-sample t-test comparing beta weights from ROI voxels

## Results analysis without noise correction

Based on the suggestions of anonymous reviewers we performed a sensitivity analysis without excluding 18 patients and 8 controls because of missing data for cardiac and respiratory noise.

We initially decided to exclude these subjects because correction for cardiac and respiratory noise appeared obligatory due to its location close to major arteries and adjacent pulsatile cerebrospinal fluid filled spaces. These physiological sources of noise generate time varying signals in fMRI data, which if left uncorrected can obscure signals of interest (Beissner and Baudrexel 2014; D'Ardenne et al, 2007).

**Supplementary Table 7. Within group activation for analysis without noise correction**

|             | Contrast                            | Location               | MNI coordinates                 | z             | Significance <sup>a</sup> |       |
|-------------|-------------------------------------|------------------------|---------------------------------|---------------|---------------------------|-------|
| Main effect | Cue+reward delivery (CS+US>Neutral) | rrMDD+healthy controls | VS                              | (6, 12, 0)    | 3.31                      | 0.000 |
|             | Cue delivery alone (CS>Neutral)     | rrMDD+healthy controls | VS                              | (6, 12, 0)    | 3.34                      | 0.000 |
|             |                                     |                        |                                 | (-3, 6, -3)   | 3.02                      | 0.001 |
|             | Reward delivery alone (US>Neutral)  | rrMDD+healthy controls | VS                              | (-6, 3, -3)   | 3.07                      | 0.001 |
|             |                                     |                        |                                 | (6, 12, 0)    | 2.93                      | 0.002 |
|             | Total TD signal (CS*TD+US*TD)       | rrMDD+healthy controls | VTA                             | (-6, -24, -6) | 2.39                      | 0.008 |
|             |                                     | VS                     | No main effect voxels in the VS |               |                           |       |

rrMDD=remitted recurrent major depressive disorder, HC=Healthy Controls, CS=conditioned stimuli, US=unconditioned stimuli, TD=temporal difference signal, VS=Ventral Striatum, VTA=Ventral Tegmental Area.

<sup>a</sup> $P_{\text{uncorrected}}$  in order to display the extent of the signal

**Supplementary Table 8. Between group activation for analysis without noise correction**

|                   |                               | Contrast               | Location                       | MNI coordinates        | z    | Significance <sup>a</sup> |
|-------------------|-------------------------------|------------------------|--------------------------------|------------------------|------|---------------------------|
| Group differences | Total TD-signal (CS*TD+US*TD) | rrMDD>healthy controls | VTA                            | (-6, -21, -6)          | 1.77 | 0.158                     |
|                   |                               |                        | VS                             | (-9, -3, -6)           | 1.95 | 0.644                     |
|                   |                               |                        |                                | (9, -6, -6)            | 1.84 | 0.688                     |
|                   |                               | healthy controls>rrMDD | No clusters survived threshold |                        |      |                           |
|                   | CS*TD                         | rrMDD>healthy controls | VTA                            | No voxels survived SVC |      |                           |
|                   |                               | healthy controls>rrMDD | No clusters survived threshold |                        |      |                           |
|                   | US*TD                         | rrMDD>healthy controls | VTA                            | No voxels survived SVC |      |                           |
|                   |                               | healthy controls>rrMDD | No clusters survived threshold |                        |      |                           |

rrMDD=remitted recurrent major depressive disorder, HC=Healthy Controls, CS=conditioned stimuli, US=unconditioned stimuli, TD=temporal difference signal, VS=Ventral Striatum, VTA=Ventral Tegmental Area.

<sup>a</sup>FWE peak level corrected + small volume corrected

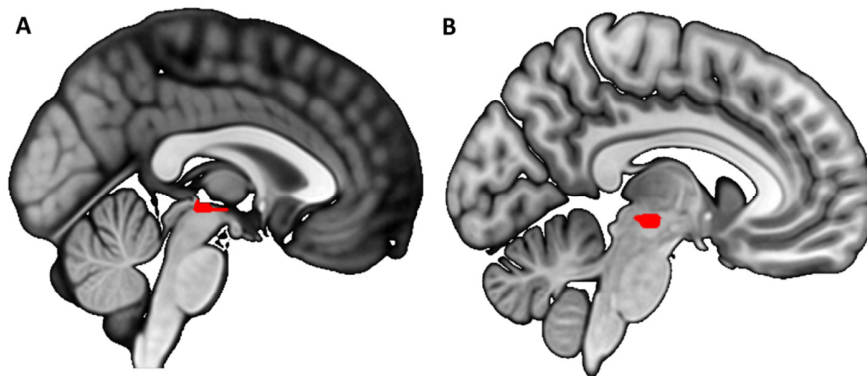

**Supplementary Figure 7. Difference main effect of PE with and without noise correction.**

(A) Main effect VTA activation ( $CS*TD+US*TD$ ) with noise correction. (B) Main effect VTA activation ( $CS*TD+US*TD$ ) without noise correction.

## References

Gradin VB, Kumar P, Waiter G, Ahearn T, Stickle C, Milders M, et al. Expected value and prediction error abnormalities in depression and schizophrenia. *Brain* 2011; 134: 1751-64.

Kumar P, Waiter G, Ahearn T, Milders M, Reid I, Steele JD. Abnormal temporal difference reward-learning signals in major depression. *Brain* 2008; 131: 2084-93.

Lawson RP, Nord CL, Seymour B, Thomas DL, Dayan P, Pilling S, et al. Disrupted habenula function in major depression. *Mol Psychiatry* 2017; 22: 202-8.

Liu TT, Frank LR, Wong EC, Buxton RB. Detection power, estimation efficiency, and predictability in event-related fMRI. *Neuroimage* 2001; 13: 759-73.

O'Doherty JP, Buchanan TW, Seymour B, Dolan RJ. Predictive neural coding of reward preference involves dissociable responses in human ventral midbrain and ventral striatum. *Neuron* 2006; 49: 157-66.

O'Doherty JP, Dayan P, Friston K, Critchley H, Dolan RJ. Temporal difference models and reward-related learning in the human brain. *Neuron* 2003; 38: 329-37.

O'Doherty JP, Dayan P, Schultz J, Deichmann R, Friston K, Dolan RJ. Dissociable roles of ventral and dorsal striatum in instrumental conditioning. *Science* 2004; 304: 452-4.

Wilson RC, Niv Y. Is Model Fitting Necessary for Model-Based fMRI? *PLoS Comput Biol* 2015; 11: e1004237.
